# Supplementary material
Source: Research Square preprint supplement (doi:10.21203/rs.3.rs-9255934/v1)
Supplement: Supplementary file 1 [file 12275e96aa0ebc82ecab8479.docx]

# Supplementary Information

**Voluntary carbon market design shapes outcomes under Article 6**

Mel George & James Edmonds

## SI-1: Extended Literature Review

The literature relevant to voluntary-compliance market interactions spans three domains: voluntary carbon market analysis, Article 6 modeling, and concerns about early mitigation depleting low-cost options.

### SI-1.1 Voluntary Carbon Markets

The voluntary carbon market literature has focused primarily on credit quality, additionality, and the credibility of corporate climate claims. The emergence of standards and certification programs, such as the Verified Carbon Standard (VCS), Gold Standard, and Climate Action Reserve, has helped to standardize and facilitate transactions in the voluntary carbon market, contributing to its growth. However, controversies persist around validation and credibility of offset projects.

Recent empirical research documents systematic integrity problems across major project categories. A comprehensive meta-analysis by Probst et al. (2024) synthesizing 14 studies covering 2,346 projects representing approximately one billion tonnes of CO2-equivalent in claimed reductions found that only 16% of carbon credits represent real emission reductions. West et al. (2023), using synthetic control methods to evaluate 26 REDD+ projects across six countries, found that most credits did not represent additional deforestation reductions. Badgley et al. (2022) identified 29% over-crediting in California’s forest offset program, worth approximately $410 million, driven by adverse selection toward carbon-dense areas. Gill-Wiehl et al. (2024) found cookstove projects over-credited by an average factor of 9.2 due to inflated baseline assumptions and unrealistic usage rates.

These findings have implications for corporate climate claims. Trencher et al. (2024) examined the 20 largest corporate offset buyers (2020–2023) and found 87% of purchased offsets came from project types at high risk of not delivering real, additional emission reductions. The UN High-Level Expert Group on Net Zero Emissions Commitments (2022) recommended that carbon credits should only support “beyond value chain mitigation,” not count toward emission reduction targets.

In response, governance initiatives have emerged. The Integrity Council for the Voluntary Carbon Market (ICVCM) released its Core Carbon Principles in 2023, establishing criteria for additionality, permanence, and robust quantification. The ICVCM framework requires disclosure of whether credits have host country authorization but stops short of mandating corresponding adjustments for high-integrity labeling (Perspectives Climate Group 2024). The ICVCM and VCMI have launched a joint work program to examine conditions under which corresponding adjustments should be required in the voluntary market. The Voluntary Carbon Markets Integrity Initiative (VCMI) has developed a Claims Code of Practice guiding corporate use of credits, though its Scope 3 flexibility provisions have drawn criticism for potentially allowing continued high emissions while claiming climate action (NewClimate Institute 2023).

Less attention has been paid to how VCMs interact with national climate commitments. Michaelowa et al. (2019) raise the question of corresponding adjustments for voluntary credits but do not model the implications quantitatively. Schneider et al. (2019) examine additionality definitions under Article 6 but focus on compliance rather than voluntary markets. The relationship between VCM transactions and NDC implementation remains largely unquantified in the academic literature.

### SI-1.2 Article 6 and International Carbon Markets

A substantial literature examines international cooperation under Article 6 using integrated assessment models. Edmonds et al. (2021) quantify how Article 6 cooperation could enhance NDC ambition through economic efficiency, finding that cooperative implementation could reduce the cost of achieving NDC goals by approximately $250 billion per year by 2030, with developing countries serving as net sellers and developed countries as net buyers; if these savings were reinvested in enhanced ambition, mitigation could increase by 50% beyond current pledges. Morris et al. (2024) demonstrate that land-based carbon dioxide removal and international emissions trading are mutually reinforcing in deep decarbonization scenarios, with trade unlocking geographically concentrated CDR potential. IETA modeling suggests Article 6 cooperation could reduce global mitigation costs by $250 billion per year by 2030 while facilitating large financial transfers to developing countries. Fujimori et al. (2016) examine whether emissions trading helps achieve Paris Agreement objectives. Hof et al. (2017) assess global and regional abatement costs of NDCs under different cooperation assumptions.

Research on Article 6 design has examined participation constraints, baseline stringency, and corresponding adjustment accounting (Schneider and La Hoz Theuer 2019; Michaelowa et al. 2019). The tension between maximizing cost efficiency and ensuring environmental integrity has been a central theme, with implications for how credits are generated, verified, and accounted. Article 6.2 allows bilateral trading of Internationally Transferred Mitigation Outcomes (ITMOs), while Article 6.4 establishes a centralized UN-supervised crediting mechanism analogous to the Clean Development Mechanism.

Implementation has proceeded slowly. The first ITMOs were issued in January 2024 from a Switzerland-Thailand electric bus program, totaling just 1,900 tonnes. However, this inaugural transaction faced criticism for dubious additionality, since the bus electrification might have proceeded without carbon finance (Carbon Market Watch 2024). Article 6.4 credits are not expected until 2025–2026 as the necessary infrastructure and methodologies remain under development. These early experiences highlight ongoing practical debates about ensuring Article 6 credits represent real, additional mitigation beyond what host countries would achieve anyway.

A critical governance question is whether voluntary credits should require corresponding adjustments. Carbon Market Watch (2024) argues it “defies logic and environmental integrity” to allow double counting where a company claims an offset while the host nation also counts that reduction toward its NDC. Under current rules, VCM credits fall outside the Article 6 framework with no requirement for host country adjustment. Some host countries have begun asserting authority over voluntary projects, indicating they will not approve exports without authorization.

Studies of cooperative NDC implementation typically model compliance markets in isolation. When voluntary markets appear, they are treated as exogenous demand shocks rather than as endogenous market participants responding to the same mitigation supply. This separation obscures interactions that may be policy-relevant as both market types scale.

### SI-1.3 The Low-Hanging Fruit Problem

The concern that early offset purchases may deplete low-cost mitigation and raise later compliance costs has been articulated conceptually but not quantified in an IAM framework for the VCM-Article 6 context. Cullenward and Victor (2020) discuss the problem qualitatively in the context of carbon market design. Wara (2007) documented analogous dynamics in the Clean Development Mechanism, where early crediting of industrial gas destruction raised questions about additionality and the distribution of mitigation effort over time.

The mechanism is straightforward: if external buyers purchase low-cost mitigation options before domestic compliance requirements bind, the host country must achieve its later commitments using more expensive alternatives. Climate Action Tracker (2025) warns that if a developed country buys credits from energy efficiency or forest conservation projects in a poorer country, “it may improve the buyer’s emissions metrics, but the seller country is left with proportionally tougher and costlier tasks to meet its own future targets once those easy options are gone.”

NewClimate Institute (2019) articulates an alternative framing: host countries should reserve low-cost, easily accessible mitigation for their own NDCs and only trade “high-hanging fruit” that represents mitigation beyond their domestic capacity. Under this principle, hosts would use any low-cost opportunities for their own targets or secure other finance for them, selling credits only for additional efforts that go beyond current plans. This approach prevents hosts from “selling themselves short” and aligns crediting with genuinely ambitious mitigation. In practice, implementation is challenging since it requires robust assessment of what is inaccessible to the host’s efforts and political will to limit supply of easy credits.

Whether early sales constitute a problem depends on normative framing. If sales generate revenue that finances capacity building, the host country may be better positioned for future mitigation despite higher marginal costs. If sales simply transfer rents to external buyers without building domestic capacity, the host country bears increased compliance costs without commensurate benefit. Critically, payments for carbon credits are transactional, not assistance: unlike grants that help a developing country cut emissions for its own benefit, a credit payment involves the host giving up emissions reductions, with the corresponding adjustment “effectively making achievement of its NDC target more difficult and costly” (Climate Action Tracker 2025). UNCTAD (2023) concludes that carbon markets do not substitute for climate finance and should not be conflated with traditional support.

### SI-1.4 Our Contribution

We contribute to this literature in three ways. First, we extend IAM-based Article 6 analyses by endogenizing a stylized voluntary buyer, demonstrating how integrated assessment models can examine interactions between voluntary and compliance carbon markets under different market designs. While stylized, the use of an IAM allows for consideration of interactions between mitigation in different regions and sectors within an economy and provides a more comprehensive assessment of impacts than partial equilibrium models focusing on single sectors. Second, we quantify how market design choices affect prices, transfers, and mitigation distribution across scenarios with different authorization and cooperation configurations. Third, we provide, to our knowledge, the first IAM-based quantification of the low-hanging fruit dynamic in the VCM-Article 6 context, showing how early voluntary purchases affect host country marginal abatement costs under specific design configurations.

Our analysis complements the VCM integrity literature by examining a dimension of credit quality that existing frameworks address incompletely: interaction with host country NDC accounting. It extends the Article 6 modeling literature by incorporating voluntary market dynamics that prior studies omit. And it provides quantitative grounding for policy discussions that have proceeded largely on conceptual arguments.

## SI-2: Full Scenario Matrix and Design Details

### SI-2.1 Complete Scenario Specification

Table SI-1 presents the complete scenario design implemented in GCAM. The seven core scenarios span two dimensions of market architecture: NDC implementation mode (independent vs. cooperative) and VCM configuration (absent, present without corresponding adjustments, present with corresponding adjustments).

**Table SI-1: Complete Scenario Specification**

| Case | Scenario Name | NDC Implementation | VCM Present | Corresponding Adjustment | Market Sequencing | Description |
| --- | --- | --- | --- | --- | --- | --- |
| 1 | I-NDC baseline | Independent | No | N/A | N/A | Each country meets NDC through domestic mitigation only |
| 2 | C-NDC baseline | Cooperative | No | N/A | N/A | Global carbon market equalizes MACs across all regions |
| 3 | VCM only | None | Yes | N/A | VCM only | VCM operates without NDC constraints |
| 4 | I-NDC + VCM | Independent | Yes | No | VCM concurrent | VCM layered on independent NDC implementation |
| 5 (AD) | C-NDC then VCM (no CA) | Cooperative | Yes | No | C-NDC first | VCM clears after compliance market; additional mitigation interpretation |
| 6 (DS) | C-NDC then VCM (no CA) | Cooperative | Yes | No | C-NDC first | VCM clears after compliance market; double-selling interpretation |
| 7 | C-NDC + VCM + CA | Cooperative | Yes | Yes | Integrated | Full market integration with corresponding adjustments |

Within Scenarios 4–7, we also explore variants (denoted A and B in the main text figures) that test different assumptions about the timing of VCM market clearing relative to compliance market operations. Variant A assumes VCM transactions occur before compliance market equilibration; Variant B assumes VCM transactions occur after. These variants allow us to isolate the sequencing effect from other design dimensions.

### SI-2.2 The AD vs. DS Distinction

The distinction between Scenarios 5 and 6 addresses a key policy question: when VCM transactions lack corresponding adjustments under cooperative NDC implementation, does the voluntary mitigation represent additional global emissions reductions beyond what the compliance market would achieve (Scenario 5, “additional mitigation” or AD), or double selling of mitigation that the compliance market would have generated anyway (Scenario 6, “double sales” or DS)?

In the AD case, VCM activities create real additional mitigation relative to the C-NDC scenario. The voluntary buyer finances emissions reductions that would not otherwise occur, and global emissions fall below the NDC-consistent trajectory.

In the DS case, the same mitigation is effectively sold twice: once to the voluntary buyer and once counted toward the seller’s NDC compliance. The voluntary buyer believes they are financing additional mitigation, but the reductions would have occurred anyway through compliance market incentives. This represents the real-world situation where credits without corresponding adjustments create ambiguity about what the buyer is actually purchasing.

This distinction has significant implications for environmental integrity and the credibility of corporate climate claims. It also affects how we interpret the value of voluntary transactions: in the AD case, VCM purchases generate real climate benefits; in the DS case, they may primarily represent accounting arbitrage.

### SI-2.3 Operationalizing Additionality

The additionality constraint is scenario-dependent. In Scenarios 3, 4, and 5 (AD), VCM supply is restricted to mitigation beyond what sellers would achieve under their NDC trajectories alone. Credits can only be generated from the incremental reduction between NDC-consistent emissions and actual emissions after VCM participation. This implementation ensures that VCM transactions create real emissions reductions rather than relabeling mitigation that would have occurred for compliance purposes.

In Scenario 6 (DS), this eligibility restriction is relaxed: VCM transactions can draw from the same mitigation pool that the compliance market mobilizes, representing situations where credits without corresponding adjustments create ambiguity about what the buyer is actually purchasing.

In Scenario 7, VCM transactions carry corresponding adjustments and are fully integrated with compliance market accounting, eliminating double-claiming by construction. This scenario variation allows us to quantify the stakes of the ongoing policy debate about whether voluntary credits should require host country authorization and NDC adjustment.

## SI-3: Global South Regional Definition

The Global South in this analysis comprises 19 GCAM regions representing developing economies across Africa, Asia, and Latin America.

**Table SI-2: Global South Regional Composition**

| Region Code | Region Name | Geographic Coverage |
| --- | --- | --- |
| Africa_Eastern | Eastern Africa | Burundi, Comoros, Djibouti, Eritrea, Ethiopia, Kenya, Madagascar, Mauritius, Reunion, Rwanda, Sudan, Somalia, Uganda |
| Africa_Northern | Northern Africa | Algeria, Egypt, Western Sahara, Libya, Morocco, Tunisia |
| Africa_Southern | Southern Africa | Angola, Botswana, Lesotho, Mozambique, Malawi, Namibia, Swaziland, Tanzania, Zambia, Zimbabwe |
| Africa_Western | Western Africa | Benin, Burkina Faso, Central African Republic, Cote d’Ivoire, Cameroon, Democratic Republic of the Congo, Congo, Cape Verde, Gabon, Ghana, Guinea, Gambia, Guinea-Bissau, Equatorial Guinea, Liberia, Mali, Mauritania, Niger, Nigeria, Senegal, Sierra Leone, Sao Tome and Principe, Chad, Togo |
| South Africa | South Africa | South Africa |
| Argentina | Argentina | Argentina |
| Brazil | Brazil | Brazil |
| Central America and Caribbean | Central America & Caribbean | Mexico, Central American states, Caribbean islands |
| Central Asia | Central Asia | Armenia, Azerbaijan, Georgia, Kazakhstan, Kyrgyzstan, Mongolia, Tajikistan, Turkmenistan, Uzbekistan |
| China | China | China (including Hong Kong) |
| Colombia | Colombia | Colombia |
| India | India | India |
| Indonesia | Indonesia | Indonesia |
| Middle East | Middle East | Saudi Arabia, Iran, Iraq, UAE, others |
| Pakistan | Pakistan | Pakistan |
| South America_Northern | Northern South America | French Guiana, Guyana, Suriname, Venezuela |
| South America_Southern | Southern South America | Bolivia, Chile, Ecuador, Peru, Paraguay, Uruguay |
| South Asia | South Asia | Afghanistan, Bangladesh, Bhutan, Sri Lanka, Maldives, Nepal |
| Southeast Asia | Southeast Asia | Thailand, Vietnam, Malaysia, Philippines, others |

The remaining 13 GCAM regions comprise the Global North and serve as potential buyers or non-participants: United States, Canada, European Union (EU-27), European Free Trade Area, United Kingdom, Australia/New Zealand, Japan, South Korea, Taiwan, and Russia.

## SI-4: NDC Construction Methodology

### SI-4.1 Approach

NDC trajectories are constructed in two phases following Ou et al. (2021).

**Phase 1: Through 2030.** We implement announced Nationally Determined Contributions as submitted to the UNFCCC. These include both unconditional commitments and, where specified, conditional commitments that assume international support.

**Phase 2: Post-2030.** Countries with Long-Term Strategies submitted to the UNFCCC follow their stated trajectories to the target year. After reaching their target, they adopt the minimum annual decarbonization rate (improvement in GHG emissions per unit GDP) observed between 2015 and the target year. Countries with net-zero pledges achieve that target in the stated year and maintain emissions at that level thereafter.

Countries without submitted Long-Term Strategies achieve either their current policy decarbonization rate or 5% annual decarbonization, whichever is greater.

### SI-4.2 Implications

This specification generates a declining global emissions trajectory broadly consistent with Paris Agreement goals, with the Global South retaining a larger share of the residual emissions budget through mid-century. The Global North transitions to net-negative emissions by 2050 under these trajectories, while the Global South continues positive but declining emissions.

## SI-5: Detailed Model Description

### SI-5.1 GCAM Overview

We employ the Global Change Analysis Model (GCAM) version 6 for this analysis. GCAM is a global integrated assessment model that simultaneously resolves energy, land use, water, and economic systems across 32 geopolitical regions, 384 land regions, and 235 water basins. The model solves in 5-year time steps using a dynamic-recursive approach. We set the model horizon to 2050. All scenarios use SSP-2 assumptions, maintaining comparability with other studies in the literature. Full model documentation is available at jgcri.github.io/gcam-doc.

GCAM represents technology choice, fuel switching, and demand response through nested logit structures that allocate market share based on relative costs. Carbon pricing affects these choices by raising the effective cost of emissions-intensive options. The model includes detailed representations of electricity generation, transportation, buildings, industry, and land use, with endogenous learning for key technologies.

### SI-5.2 Voluntary Carbon Market Implementation

We model a hypothetical voluntary carbon market in which U.S. energy-intensive industries commit to emissions reductions beyond national policy requirements. Specifically, we assume a voluntary commitment in which CO2 emissions decline linearly to net-zero by 2030. This commitment is independent of U.S. government obligations under its NDC and Long-Term Strategy.

This buyer specification is intentionally stylized to generate meaningful VCM transaction volumes. It represents the behavior of ambitious early-moving corporate actors who face incentives to secure low-cost mitigation before compliance markets tighten supply and before competition from other voluntary buyers increases prices. The aggressive timeline concentrates demand in the period where VCM-NDC interactions are most consequential. Buyers expecting later net-zero targets would face similar incentives to move early precisely because early VCM supply is cheaper; our specification captures this first-mover logic.

U.S. industry meets its voluntary commitment through a combination of domestic mitigation and purchases from the Global South via the VCM. We restrict VCM supply to mitigation that represents net emissions reductions beyond what seller countries would achieve under their own NDC trajectories (except in Scenario 6; see SI-2.3). This additionality requirement ensures that VCM transactions create real emissions reductions rather than relabeling mitigation that would have occurred for compliance purposes.

The U.S. is modeled as both a compliance market participant (meeting its NDC) and as the source of voluntary buyer demand (from energy-intensive industries with beyond-NDC commitments). This dual role reflects real-world conditions where U.S. companies make voluntary commitments independent of federal policy. The U.S. NDC is implemented per announced targets through 2030 and extended per Ou et al. (2021) thereafter; the voluntary buyer commitment is additional to this baseline.

### SI-5.3 Compliance Market Implementation

We model NDC implementation under two configurations. Under independent implementation (I-NDC), each country meets its NDC through domestic mitigation only, with no international trading of emissions reductions. Under cooperative implementation (C-NDC), all countries participate in a global carbon market that equalizes marginal abatement costs across regions, consistent with the intent of Article 6 of the Paris Agreement. Cooperative implementation is global, not restricted to the Global South. In cooperative scenarios, all compliance market transactions are accompanied by corresponding adjustments to national emissions accounts, ensuring no double counting of mitigation toward multiple NDCs.

### SI-5.4 Sequential Market Implementation

A distinctive feature of our approach is the sequential implementation of voluntary and compliance markets. Rather than solving all market interactions simultaneously, we first clear the VCM and then use those results as inputs to the NDC compliance run.

This sequential approach encodes an assumption about temporal priority: private voluntary actors move before governments fully operationalize Article 6 mechanisms. This is arguably realistic given the current state of carbon market development, where voluntary markets are active and growing while Article 6 infrastructure remains nascent. The sequential implementation also allows us to trace how early VCM transactions affect the supply of mitigation available to subsequent compliance markets.

When VCM transactions occur without corresponding adjustments, the mitigation is not subtracted from seller country emissions accounts. The seller has reduced physical emissions beyond its NDC requirement but retains full credit toward its own NDC. When VCM transactions occur with corresponding adjustments, the seller’s emissions account is adjusted upward by the amount sold, maintaining atmospheric integrity but reducing the seller’s NDC headroom.

## SI-6: Limitations

Several limitations constrain interpretation of our results.

We employ a single integrated assessment model (GCAM). While GCAM is well-documented and widely used for policy analysis, results may be sensitive to model structure, particularly the representation of marginal abatement costs across regions and sectors. Multi-model analysis would strengthen confidence in findings, though the novel market structures we implement may not be readily portable across platforms.

Our buyer specification is stylized. Real voluntary markets involve heterogeneous buyers with varying ambition levels, budget constraints, and credit preferences. We model a single aggressive buyer to generate meaningful transaction volumes. This concentration of demand likely amplifies price effects relative to a market with many smaller buyers entering at different times; with heterogeneous buyers, price dynamics would be smoother and the sharp sequencing effects we identify would be attenuated. However, the directional findings on market architecture and the low-hanging fruit mechanism should persist under alternative demand specifications, even if magnitudes shift. Results are illustrative of mechanisms rather than predictive of market outcomes.

Critically, we assume that all VCM credits represent real emissions reductions in the host country’s net emissions. This is a very strong assumption that abstracts from documented integrity problems in real VCMs, where meta-analyses suggest only a fraction of credits represent additional reductions (Probst et al. 2024; West et al. 2023). Our results describe potential market dynamics under conditions of perfect additionality and verification, not predictions of actual market performance with current integrity standards. We also do not model credit quality heterogeneity; real VCMs distinguish between emission reductions and removals, between project types with different permanence profiles, and between credits with varying integrity ratings. Our homogeneous credit treatment abstracts from distinctions that affect real-world prices and preferences.

We abstract from transaction costs, MRV requirements, and institutional frictions that affect real-world market operations. These frictions may particularly affect sequencing results if compliance market transactions face higher verification requirements than VCM transactions. Real-world considerations such as monitoring and verification timing, the temporal distribution of emissions limitations when NDCs target fixed dates, and risks of reneging or failing to deliver are not captured in our modeling framework.

Differences in standards, methodologies, and governance structures between VCMs and compliance markets pose obstacles to seamless integration and effective coordination that our modeling does not capture. These institutional barriers may be as important as the economic mechanisms we analyze in determining real-world market outcomes.

Our post-2030 NDC trajectories are constructed following Ou et al. (2021) rather than announced. Actual future NDCs may differ substantially, affecting the size of Article 6 markets and the availability of beyond-NDC supply for VCMs.

Despite these limitations, we believe the core findings are robust in direction if not precise magnitude. VCMs matter more early than late in the transition. Design choices about authorization and sequencing materially affect outcomes. The low-hanging fruit dynamic operates but is design-contingent. These findings rest on structural features of market interaction, not on specific parameter choices.

## SI-7: Sensitivity Considerations and Future Work

This analysis is designed to illuminate mechanisms rather than predict market outcomes. The core mechanisms we identify rest on structural features of market interaction rather than specific parameter choices.

Future analyses could explore sensitivity along several dimensions. Our buyer achieves net-zero by 2030; later targets would shift demand into periods where compliance markets are more developed, potentially altering sequencing dynamics. A larger or smaller buyer pool would affect price levels and transfer magnitudes, though directional findings on market architecture should persist. We model U.S. buyers only; European or Asian buyers would draw on different seller pools and face different transport/transaction costs. More or less ambitious NDC trajectories would affect the pool of beyond-NDC mitigation available for VCM transactions and the marginal abatement costs in compliance markets. Modeling heterogeneous credit types (reductions vs. removals, nature-based vs. technology-based) would allow examination of how quality differentiation affects price formation and market segmentation. As Article 6 infrastructure matures, the sequencing assumptions underlying our scenarios will require updating to reflect actual market timing.

## SI References

References are provided in the main text.
